# Supplementary material for: Elevated Glucose on Admission Was an Independent Risk Factor for 30-Day Major Adverse Cardiovascular Events in Patients with STEMI but Not NSTEMI
Source: PubMed Central journal article supplement (PMC11263140; doi:10.31083/j.rcm2502046), 2024-01-29
Supplement: 2153-8174-25-2-046-s1.pdf [file 2153-8174-25-2-046-s1.pdf]

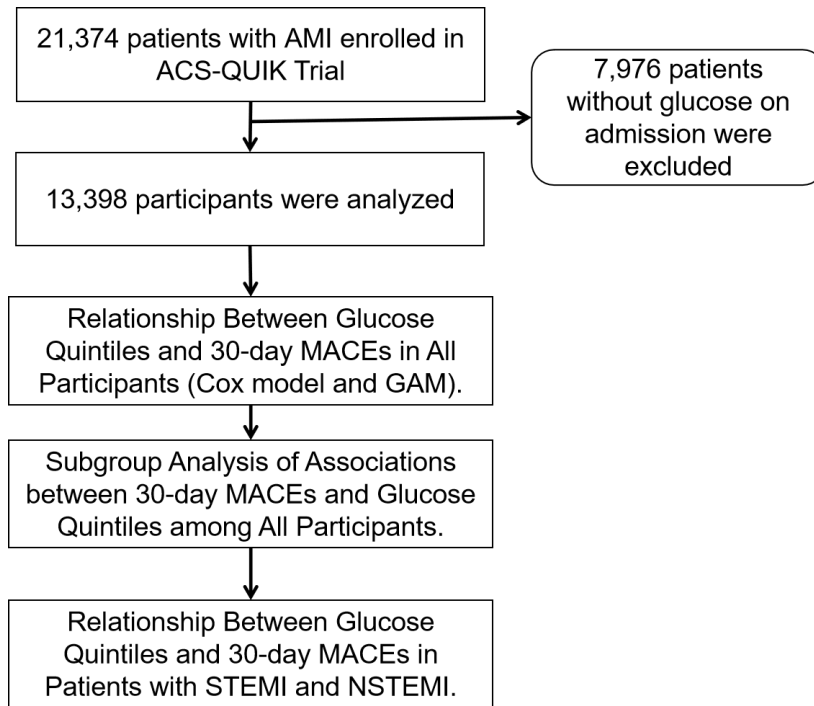

**Supplementary Fig. 1.** The flowchart of analysis in this study.

**Supplementary Table 1.** The diagnosis of multicollinearity in the covariates included in the fully adjusted logistic model.

| <b>Covariates</b>           | <b>VIF</b> |
|-----------------------------|------------|
| Intervention                | 1          |
| Age                         | 1.2        |
| Male                        | 1.3        |
| Symptom onset to arrival    | 1          |
| SBP                         | 1.1        |
| Weight                      | 1.2        |
| Smoking or tobacco          | 1.2        |
| Diabetes                    | 1.4        |
| Antiplatelet                | 1          |
| Beta Blocker                | 1          |
| PCI                         | 1.1        |
| Cardiac arrest at admission | 1          |
| Hypertension                | 1.2        |
| prior TIA or stroke         | 1          |
| PAD                         | 1          |
| LVEF category               | 1          |
| MI type                     | 1.3        |

**Supplementary Table 2.** Logistic regression results of each covariate and MACE.

| <b>Covariates</b>           | <b>Term</b>                          | <b>OR</b> | <b>95%CI<br/>Low</b> | <b>95%CI<br/>Upp</b> | <b>P value</b> |
|-----------------------------|--------------------------------------|-----------|----------------------|----------------------|----------------|
| Intervention                | factor (Intervention)                | 0.8159    | 0.7276               | 0.9149               | 0.0005         |
| Age                         | Age                                  | 1.0424    | 1.0374               | 1.0475               | <0.0001        |
| Male                        | factor (Male)                        | 0.5177    | 0.4594               | 0.5834               | <0.0001        |
| Symptom onset to arrival    | Symptom onset to arrival             | 1         | 1                    | 1.0001               | 0.0285         |
| SBP                         | SBP                                  | 0.9844    | 0.9823               | 0.9865               | <0.0001        |
| Weight                      | Weight                               | 0.9732    | 0.9673               | 0.9791               | <0.0001        |
| Smoking or tobacco          | factor (Smoking or tobacco)          | 0.7919    | 0.6957               | 0.9015               | 0.0004         |
| Diabetes                    | factor (Diabetes)                    | 1.4023    | 1.2505               | 1.5726               | <0.0001        |
| Antiplatelet                | factor (Antiplatelet)                | 0.3644    | 0.2708               | 0.4903               | <0.0001        |
| Beta Blocker                | factor (Beta Blocker)                | 0.5064    | 0.4433               | 0.5784               | <0.0001        |
| PCI                         | factor (PCI)                         | 0.4205    | 0.3715               | 0.476                | <0.0001        |
| Cardiac arrest at admission | factor (Cardiac arrest at admission) | 15.4705   | 12.2759              | 19.4965              | <0.0001        |
| Hypertension                | factor (Hypertension)                | 1.2829    | 1.1439               | 1.4387               | <0.0001        |
| prior TIA or stroke         | factor (prior TIA or stroke)         | 2.9795    | 2.2986               | 3.8621               | <0.0001        |
| MI type                     | factor (STEMI)                       | 1.2858    | 1.1361               | 1.4553               | 0.0001         |

|               |                          |        |        |        |         |
|---------------|--------------------------|--------|--------|--------|---------|
| PAD           | factor (PAD)             | 2.8644 | 1.9466 | 4.2151 | <0.0001 |
| LVEF category | factor (LVEF 41% to 69%) | 0.2658 | 0.2316 | 0.3051 | <0.0001 |
|               | factor (LVEF $\geq$ 70%) | 0.2653 | 0.1919 | 0.3666 | <0.0001 |

**Supplementary Table 3.** The parameters of other covariates in the Generalized additive model.

| Covariates                  | P value | OR     | 95%CI       |             |
|-----------------------------|---------|--------|-------------|-------------|
|                             |         |        | lower limit | upper limit |
| Intervention                | 0.1063  | 0.8578 | 0.7121      | 1.0333      |
| Age                         | <0.0001 | 1.0323 | 1.0238      | 1.0409      |
| STEMI                       | 0.0006  | 1.4377 | 1.169       | 1.7682      |
| Male                        | <0.0001 | 0.5971 | 0.4794      | 0.7437      |
| Symptom onset to arrival    | 0.0422  | 1.0001 | 1           | 1.0001      |
| SBP                         | <0.0001 | 0.9936 | 0.9905      | 0.9967      |
| Weight                      | 0.3233  | 0.9949 | 0.9849      | 1.005       |
| Smoking or tobacco          | 0.1646  | 1.1808 | 0.9341      | 1.4926      |
| Diabetes                    | 0.8875  | 1.0153 | 0.8228      | 1.2529      |
| Antiplatelet                | 0.8758  | 0.9592 | 0.5689      | 1.6172      |
| Beta Blocker                | 0.0001  | 0.6636 | 0.5426      | 0.8115      |
| PCI                         | <0.0001 | 0.4146 | 0.3352      | 0.5128      |
| Cardiac arrest at admission | <0.0001 | 9.9922 | 6.6319      | 15.0551     |
| Hypertension                | 0.4737  | 1.0752 | 0.8818      | 1.3111      |
| prior TIA or stroke         | <0.0001 | 2.2885 | 1.581       | 3.3125      |
| PAD                         | 0.0524  | 1.8641 | 0.9935      | 3.4977      |
| factor(LVEF 41% to 69%)     | <0.0001 | 0.4349 | 0.3506      | 0.5394      |
| factor(LVEF $\geq$ 70%)     | 0.0001  | 0.35   | 0.2041      | 0.6003      |
